# Supplementary material for: Enhancing antibody levels and T cell activity of quadrivalent influenza vaccine by combining it with CpG HP021
Source: PubMed Central journal article supplement — Sci Rep. 2024 Dec 28;14:31424. doi: 10.1038/s41598-024-83026-x (PMC11682164; doi:10.1038/s41598-024-83026-x), 2024-12-28
Supplement: 41598_2024_83026_MOESM1_ESM.pdf [file 41598_2024_83026_MOESM1_ESM.pdf]

1 **Enhancing antibody levels and T cell activity of quadrivalent**  
2 **influenza vaccine by combining it with CpG HP021**

3 **Jia Ji<sup>1,2</sup>, Lei Chen<sup>3</sup>, Zhigang Wu<sup>1</sup>, Taoming Tang<sup>1</sup>, Linwei Zhu<sup>1</sup>, Miaojin Zhu<sup>1</sup>,**  
4 **Yan Chen<sup>4</sup>, Xiangyun Lu<sup>1</sup>, Hangping Yao<sup>1,2\*</sup>**

5 <sup>1</sup> State Key Laboratory for Diagnosis and Treatment of Infectious Diseases, National  
6 Clinical Research Center for Infectious Diseases, Collaborative Innovation Center for  
7 Diagnosis and Treatment of Infectious Diseases, The First Affiliated Hospital, School  
8 of Medicine, Zhejiang University, Hangzhou, 310003, China.

9 <sup>2</sup> Jinan Microecological Biomedicine Shandong Laboratory, Jinan, 250000, China.

10 <sup>3</sup> Zhejiang Toyouvax Bio-pharmaceutical Co., Ltd, 311100, Hangzhou, China.

11 <sup>4</sup> Jiangsu Taipurui Biotechnology Co., Ltd, 225300, Taizhou, China.

12

13 **Jia Ji and Lei Chen contributed equally to this work.**

14 **\* Correspondence to Hangping Yao, yaohangping@zju.edu.cn**

15

## Supporting Information

16 **Supplementary Table 1. The seroconversion rates of the antibodies after**17 **vaccination in mice.**18 **The seroconversion rates of the antibodies (%)**

| <b>Groups (No.)</b>            |      | <b>Day 14</b> | <b>Day 21</b> | <b>Day 28</b> | <b>Day 56</b> |
|--------------------------------|------|---------------|---------------|---------------|---------------|
| IIV4 antigen<br>(Non-adjuvant) | H1N1 | 0.0%          | 75.0%         | 100.0%        | 100.0%        |
|                                | H3N2 | 0.0%          | 50.0%         | 58.3%         | 66.7%         |
|                                | BV   | 0.0%          | 41.7%         | 91.7%         | 83.3%         |
|                                | BY   | 0.0%          | 0.0%          | 8.3%          | 33.3%         |
| IIV4 + 10 $\mu$ g CpG          | H1N1 | 0.0%          | 100.0%        | 100.0%        | 100.0%        |
|                                | H3N2 | 0.0%          | 66.7%         | 77.8%         | 100.0%        |
|                                | BV   | 83.3%         | 100.0%        | 100.0%        | 100.0%        |
|                                | BY   | 0.0%          | 55.6%         | 66.7%         | 33.3%         |
| IIV4 + 20 $\mu$ g CpG          | H1N1 | 16.7%         | 100.0%        | 100.0%        | 100.0%        |
|                                | H3N2 | 0.0%          | 75.0%         | 91.7%         | 66.7%         |
|                                | BV   | 83.3%         | 100.0%        | 100.0%        | 100.0%        |
|                                | BY   | 0.0%          | 66.7%         | 91.7%         | 83.3%         |
| IIV4 + 40 $\mu$ g CpG          | H1N1 | 75.0%         | 100.0%        | 100.0%        | 100.0%        |
|                                | H3N2 | 8.3%          | 91.7%         | 100.0%        | 100.0%        |
|                                | BV   | 100.0%        | 100.0%        | 100.0%        | 100.0%        |
|                                | BY   | 0.0%          | 100.0%        | 100.0%        | 100.0%        |
| IIV4 + 80 $\mu$ g CpG          | H1N1 | 41.7%         | 91.7%         | 100.0%        | 100.0%        |
|                                | H3N2 | 0.0%          | 83.3%         | 91.7%         | 100.0%        |
|                                | BV   | 91.7%         | 100.0%        | 100.0%        | 100.0%        |
|                                | BY   | 0.0%          | 83.3%         | 91.7%         | 100.0%        |
| IIV4 + 160 $\mu$ g CpG         | H1N1 | 75.0%         | 100.0%        | 100.0%        | 100.0%        |
|                                | H3N2 | 0.0%          | 83.3%         | 91.7%         | 100.0%        |
|                                | BV   | 91.7%         | 100.0%        | 100.0%        | 100.0%        |
|                                | BY   | 0.0%          | 91.7%         | 91.7%         | 100.0%        |

19 **Supplementary Table 2. The seroconversion rates of antibodies after the**  
 20 **vaccination in SD rats.**

| <b>The seroconversion rates of antibodies (%)</b> |      |               |               |               |
|---------------------------------------------------|------|---------------|---------------|---------------|
| <b>Groups (No.)</b>                               |      | <b>Day 14</b> | <b>Day 21</b> | <b>Day 28</b> |
| IIV4 antigen<br>(Non-adjuvant)                    | H1N1 | 100%          | 100%          | 100%          |
|                                                   | H3N2 | 0%            | 50%           | 33%           |
|                                                   | BV   | 100%          | 100%          | 100%          |
|                                                   | BY   | 33%           | 83%           | 67%           |
| 6 µg IIV4 + 50 µg CpG                             | H1N1 | 100%          | 100%          | 100%          |
|                                                   | H3N2 | 50%           | 100%          | 100%          |
|                                                   | BV   | 100%          | 100%          | 100%          |
|                                                   | BY   | 100%          | 100%          | 100%          |
| 6 µg IIV4 + 100 µg CpG                            | H1N1 | 100%          | 100%          | 100%          |
|                                                   | H3N2 | 67%           | 100%          | 100%          |
|                                                   | BV   | 100%          | 100%          | 100%          |
|                                                   | BY   | 100%          | 100%          | 100%          |
| 6 µg IIV4 + 200 µg CpG                            | H1N1 | 100%          | 100%          | 100%          |
|                                                   | H3N2 | 83%           | 100%          | 100%          |
|                                                   | BV   | 100%          | 100%          | 100%          |
|                                                   | BY   | 100%          | 100%          | 100%          |
| 6 µg IIV4 + 400 µg CpG                            | H1N1 | 100%          | 100%          | 100%          |
|                                                   | H3N2 | 100%          | 100%          | 100%          |
|                                                   | BV   | 100%          | 100%          | 100%          |
|                                                   | BY   | 100%          | 100%          | 100%          |

21

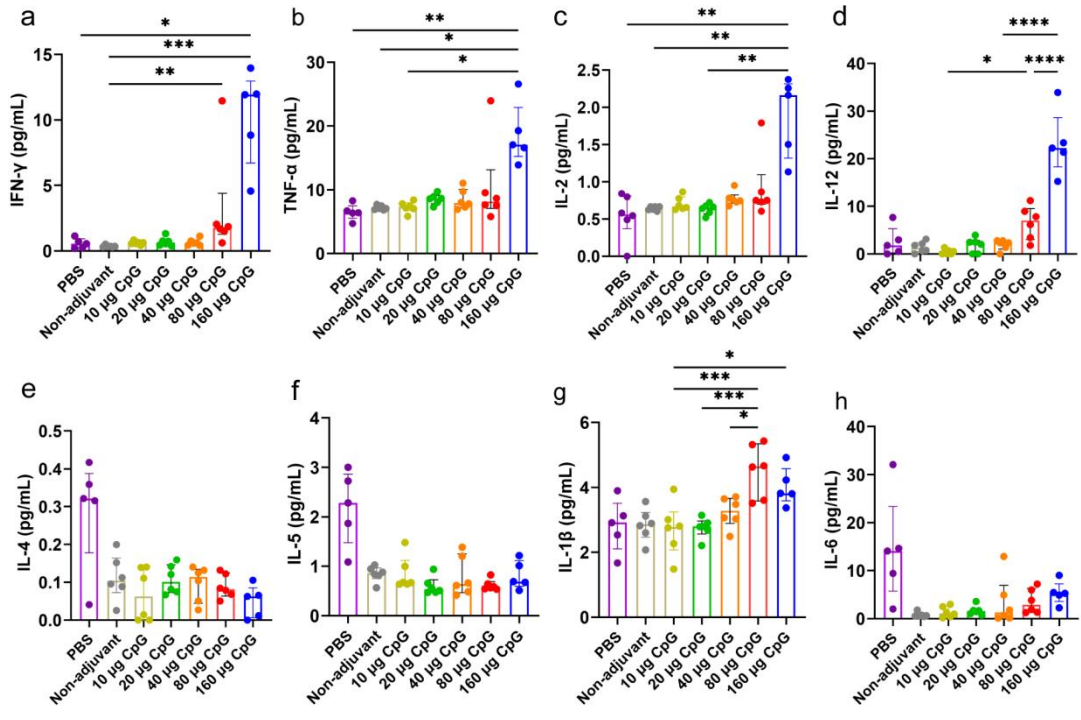

22

23 **Supplementary Fig 1. Analysis of serum cytokine levels in mice at day 28.**
